# Supplementary material
Source: publisher site journal article supplement (https://www.dovepress.com/article/239252)
Supplement: Supplementary file 1 [file get_supplementary_file.php]

Supplementary Table 1 Table The clinical data of patients with non-small cell lung cancer and the healthy

|  | The training set | | The test set | |
| --- | --- | --- | --- | --- |
| Healthy  (n=83) | NSCLC  (n=106) | Healthy  (n=85) | NSCLC  (n=104) |
| Age(mean±sd) | 43.93±9.26 | 60.85±12.01 | 43.40±10.02 | 60.64±10.5 |
| Gender(Male/Female) | 65/18 | 76/30 | 65/20 | 72/32 |
| Type |  |  |  |  |
| Adenocarcinoma | / | 69.81% | / | 75% |
| Squamouscarcinoma | / | 30.19% | / | 25% |
| Differentiation |  |  |  |  |
| Low | / | 22.64% | / | 18.27% |
| Moderate | / | 19.81% | / | 20.19% |
| High | / | 1.8% | / | 2.88% |
| unknown | / | 55.66% | / | 57.69% |
| Stage |  |  |  |  |
| Below Ⅲ | / | 12.26% | / | 6.73% |
| Ⅲ | / | 14.15% | / | 16.35% |
| Ⅳ | / | 52.83% | / | 57.69% |
| unknown | / | 20.75% | / | 19.23% |
| Metastasis |  |  |  |  |
| Yes | / | 49.06% | / | 56.73% |
| No | / | 34.91% | / | 25.96% |
| unknown | / | 16.04% | / | 17.31% |

Supplementary Table 2-1 Logistic regression analysis of serum PDGF-AA before and after adjustment of sex and age as covariates

|  | unadjusted | | | Adjusted (age & sex) | | |
| --- | --- | --- | --- | --- | --- | --- |
|  | OR | (95%CI) | *P*-value | OR | (95%CI) | *P*-value |
| N vs NSCLC | 0.983 | (0.975,0.990) | 6.08e-06 | 0.987 | (0.979,0.995) | 0.002677 |
| N vs SCLC | 0.967 | (0.944,0.987) | 0.00264 | 0.980 | (0.950,1.007) | 0.159 |

Supplementary Table 2-2 Logistic regression analysis of serum PDGF-AB/BB before and after adjustment of sex and age as covariates

|  | unadjusted | | | Adjusted (age & sex) | | |
| --- | --- | --- | --- | --- | --- | --- |
|  | OR | (95%CI) | *P*-value | OR | (95%CI) | *P*-value |
| N vs NSCLC | 0.977 | (0.972,0.982) | <2e-16 | 0.977 | (0.972,0.983) | 1.66e-14 |
| N vs SCLC | 0.969 | (0.954,0.982) | 1.5e-05 | 0.966 | (0.944,0.983) | 0.000756 |
